# Supplementary material for: Potential targets and the action mechanism of food-derived dipeptides on colitis: network pharmacology and bioinformatics analysis
Source: Royal Society of Chemistry journal article supplement (doi:10.1039/d1fo00469g), 2021-01-01
Supplement: d1fo00469g2.pdf [file d1fo00469g2.pdf]

1 **Supplement Figures**

2 **Figure S1** Changes in the structure of reference ligands before and after re-docking

3 **Figure S2** Position of dipeptides in the hydrophobic depression domain of targets

4
